# Supplementary material for: Heteroarm core cross-linked star polymers via RAFT copolymerization of styrene and bismaleimide
Source: Royal Society of Chemistry journal article supplement (doi:10.1039/c6ra07527d), 2016-01-01
Supplement: c6ra07527d1.pdf [file c6ra07527d1.pdf]

## **Electronic Supplementary Information**

### **Heteroarm Core Cross-linked Star Polymers via RAFT Copolymerization of Styrene and Bismaleimide**

Nam Young Ahn, Myungeun Seo\*

Graduate School of Nanoscience and Technology, Korea Advanced Institute of Science and  
Technology (KAIST), Daejeon 34141, Republic of Korea

\*To whom should be addressed: seomyungeun@kaist.ac.kr

#### **This Information Includes:**

Table S1

Figures S1 – S7

Table S1. Variation of [S]:[BMI]:[PLA-CTA]

| Entry | [S]:[BMI]:[PLA-CTA] | Conversion (%) <sup>a</sup> | $M_{n,NMR}$ (kg mol <sup>-1</sup> ) <sup>b</sup> | $f_{PS}^c$ | $M_{n,SEC}$ (kg mol <sup>-1</sup> ) <sup>d</sup> | $\bar{D}^d$ |
|-------|---------------------|-----------------------------|--------------------------------------------------|------------|--------------------------------------------------|-------------|
| 1     | 500:1:1             | 18                          | 11                                               | 0.30       | 65                                               | 1.31        |
| 2     | 500:2:1             | 19                          | 11                                               | 0.30       | 76                                               | 1.45        |
| 3     | 500:4:1             | 22                          | 13                                               | 0.34       | 221                                              | 1.28        |
| 4     | 500:6:1             | 19                          | 12                                               | 0.32       | 296                                              | 1.33        |
| 5     | 500:8:1             | 25                          | 13                                               | 0.34       | 487                                              | 1.37        |
| 6     | 200:2:1             | 34                          | 7                                                | 0.22       | 175                                              | 1.22        |

<sup>a</sup>Estimated by <sup>1</sup>H NMR analysis of the aliquots.

<sup>b</sup>Estimated by <sup>1</sup>H NMR analysis of the polymers based on the integration of PLA and PS protons assuming  $M_{n,PLA} = 30$  kg mol<sup>-1</sup>.

<sup>c</sup>Assuming the polymer is only composed of PLA and PS, and their densities are 1.25 and 1.05 g mL<sup>-1</sup>, respectively.

<sup>d</sup>Determined by CHCl<sub>3</sub>-SEC based on linear PS standards.

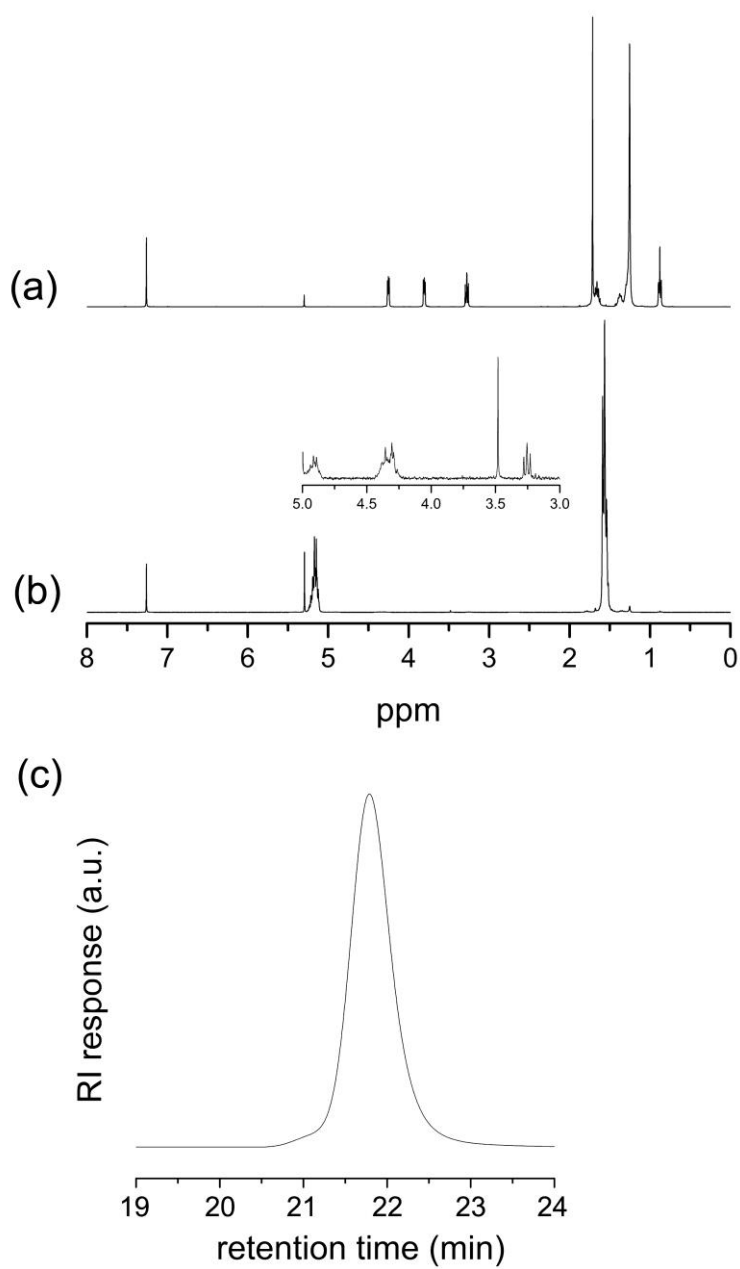

Figure S1. (a)  $^1\text{H}$  NMR spectrum of PLA-CTA (400 MHz,  $\text{CDCl}_3$ , 20 °C). The inset shows a magnified spectrum of PLA-CTA in the range of 3 – 5 ppm used for  $M_n$  determination by end group analysis. (b) SEC trace of PLA-CTA (chloroform, 35 °C, 1 mL min $^{-1}$ , RI detector).

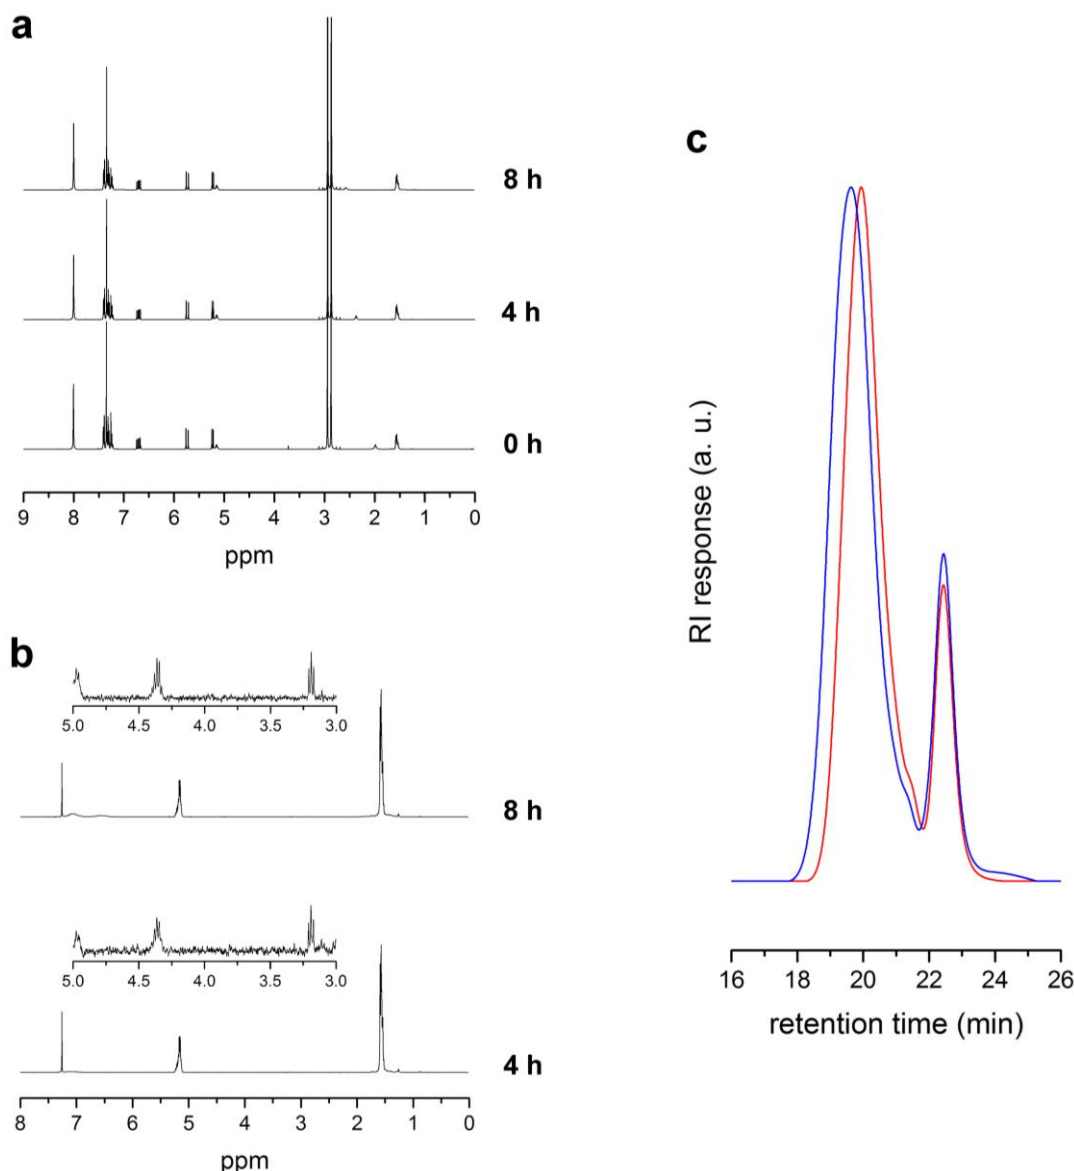

Figure S2. (a) <sup>1</sup>H NMR spectra of the polymerization mixture containing S, BMI, PLA-CTA ( $M_{n, \text{PLA-CTA}} = 22 \text{ kg mol}^{-1}$ , [S]:[BMI]:[PLA-CTA] = 500:8:1), and DMF after 0 (bottom), 4 (middle), and 8 h (top) of polymerization at 60 °C (400 MHz, CDCl<sub>3</sub>, 20 °C). A peak at 3.7 ppm disappearing after 4 h corresponds to ethylene protons of BMI. (b) <sup>1</sup>H NMR spectra of the polymers synthesized by 4 (bottom) and 8 h (top) of polymerization and obtained by precipitation in methanol. Insets provide a magnified view in the range of 5 – 3 ppm showing absence of peak corresponding to BMI repeating units. (c) SEC traces of the polymers obtained by 4 (red) and 8 h (blue) of polymerization (chloroform, 35 °C, 1 mL min<sup>-1</sup>, RI detector).

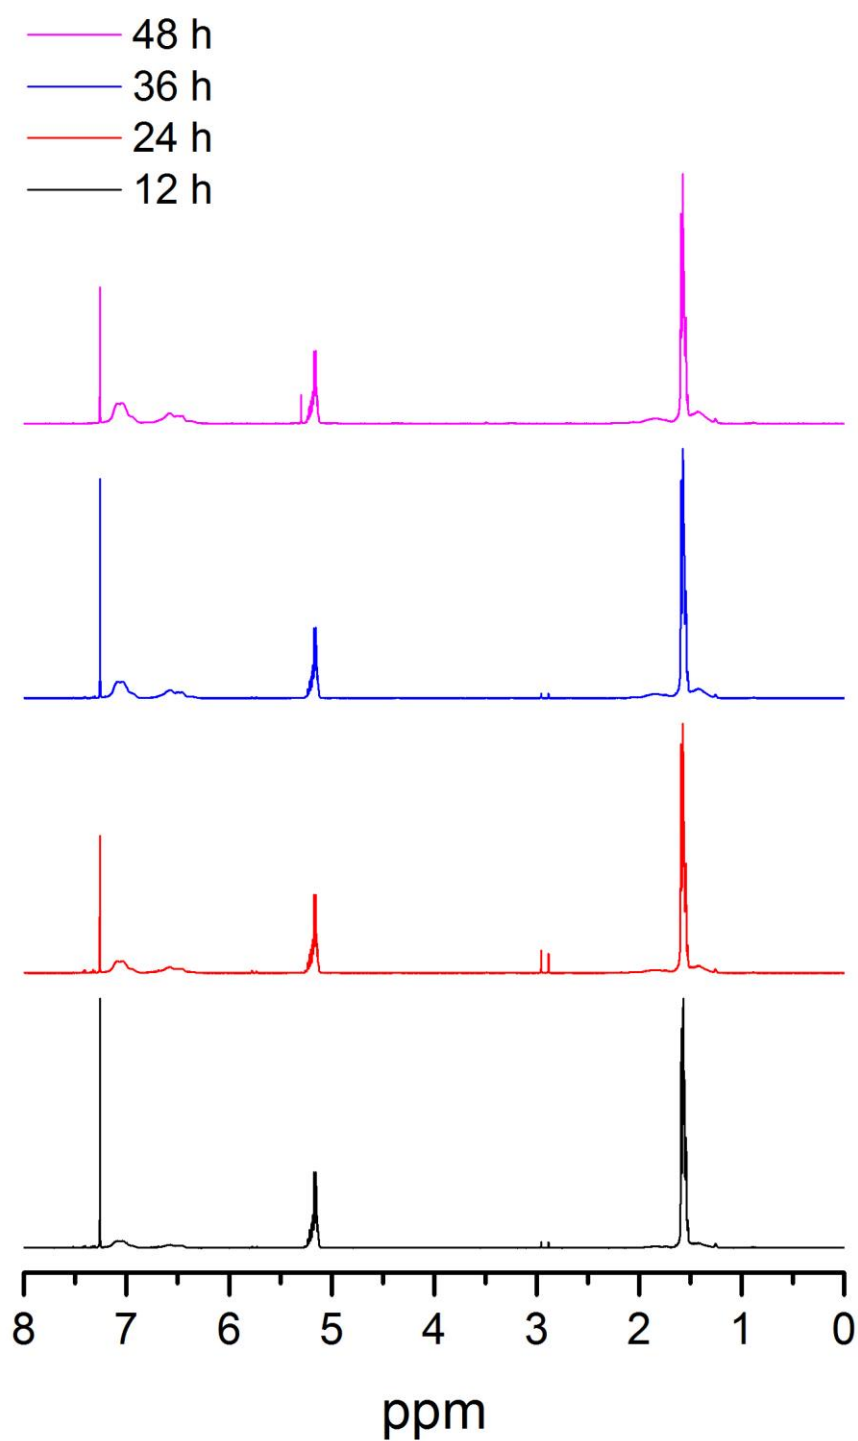

Figure S3.  $^1\text{H}$  NMR spectra of  $\text{PLA}_n\text{PS}_n$  obtained with different polymerization time (400 MHz,  $\text{CDCl}_3$ , 20  $^\circ\text{C}$ ). Two small singlets at 3.0 – 2.8 ppm originate from residual DMF which was the reaction solvent.

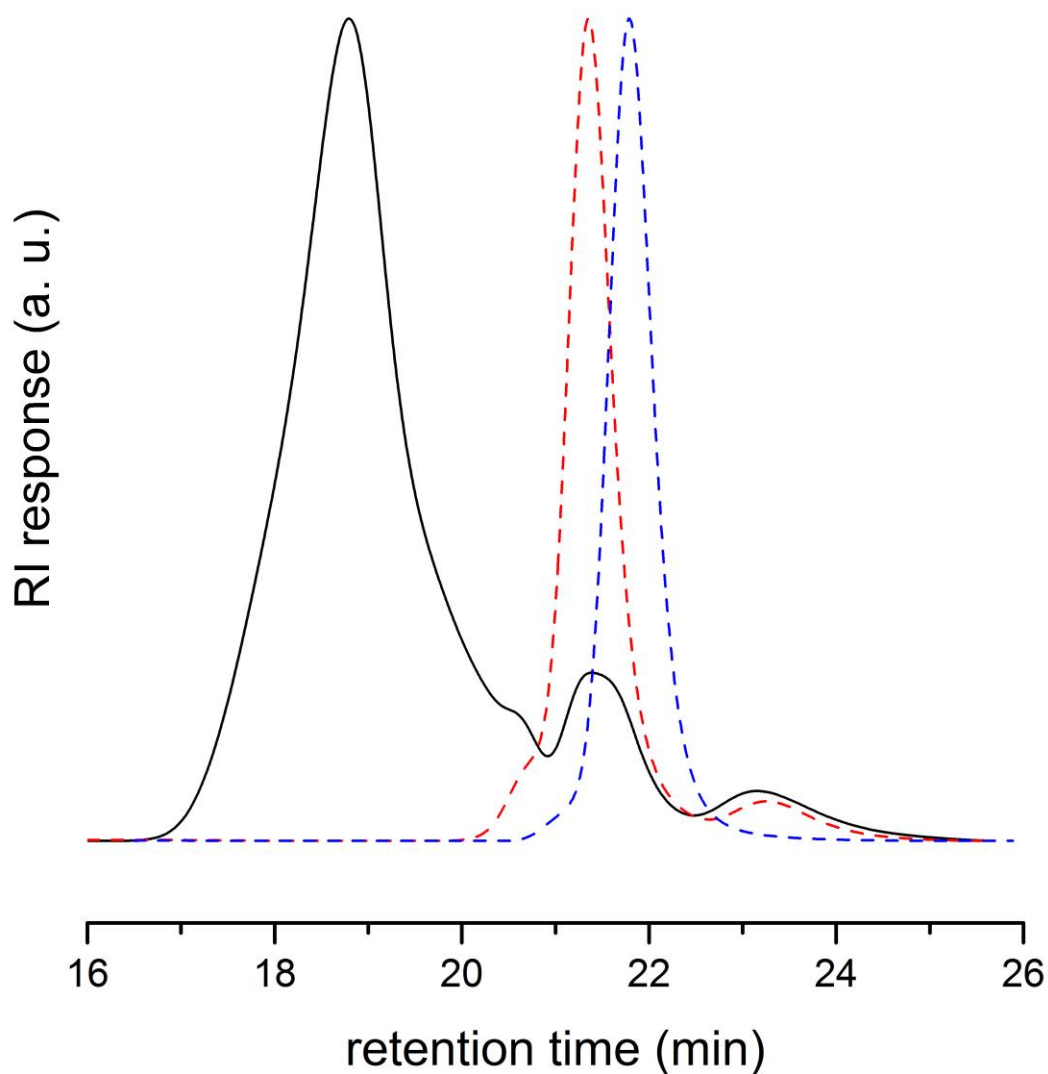

Figure S4. SEC traces of PLA-CTA ( $30 \text{ kg mol}^{-1}$ , blue dashed line), linear PLA-b-PS which was obtained by polymerization of S in the presence of PLA-CTA ( $[\text{S}]:[\text{PLA-CTA}] = 500:1$ ) at  $60^\circ\text{C}$  for 24 h (red dashed line), and  $\text{PLA}_n\text{PS}_n$  (Entry 3 in Table 1, black solid line). The traces were recorded with a RI detector using chloroform as eluent at  $35^\circ\text{C}$  with flow rate of  $1 \text{ mL min}^{-1}$ .

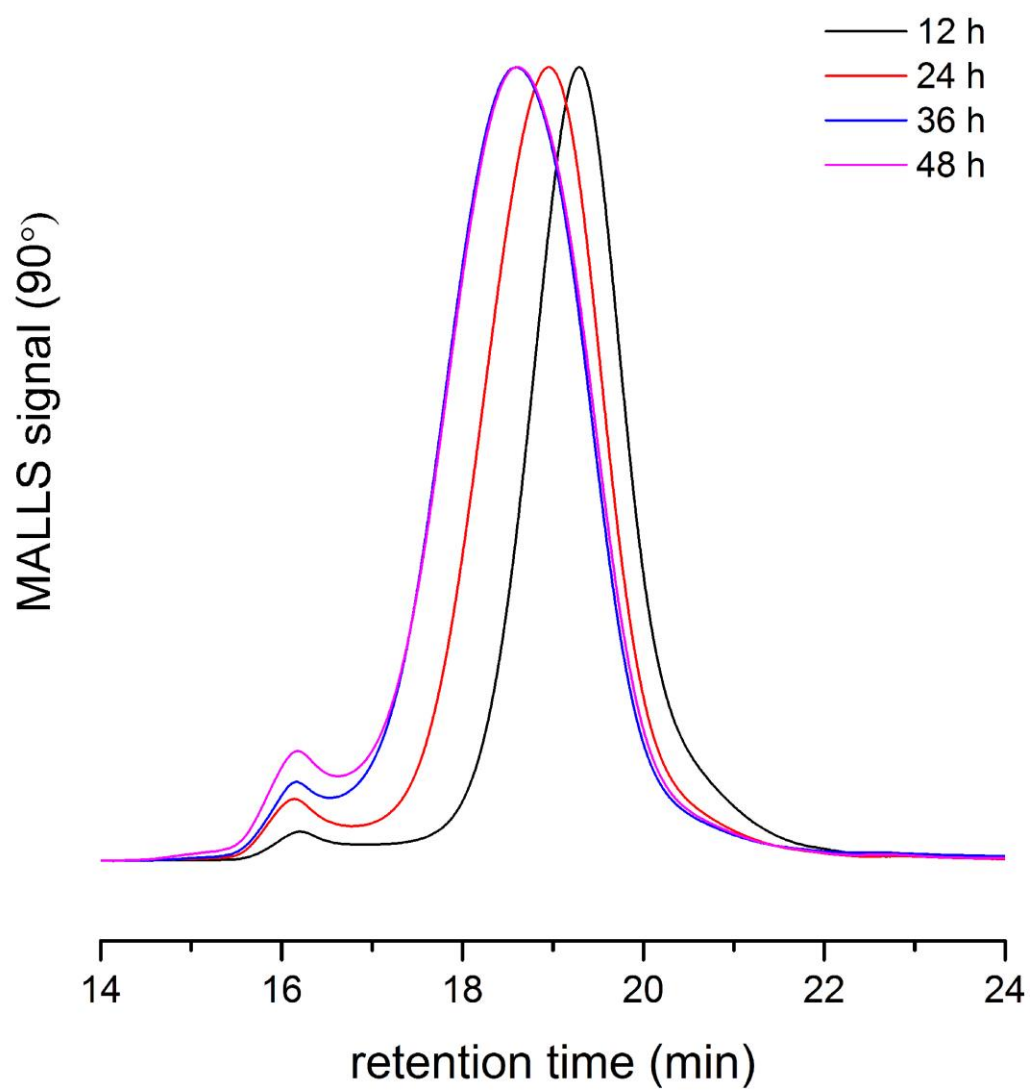

Figure S5. SEC traces of PLA<sub>n</sub>PS<sub>n</sub> shown in Table 1 recorded with a MALLS detector (THF, 40 °C, 1 mL min<sup>-1</sup>).

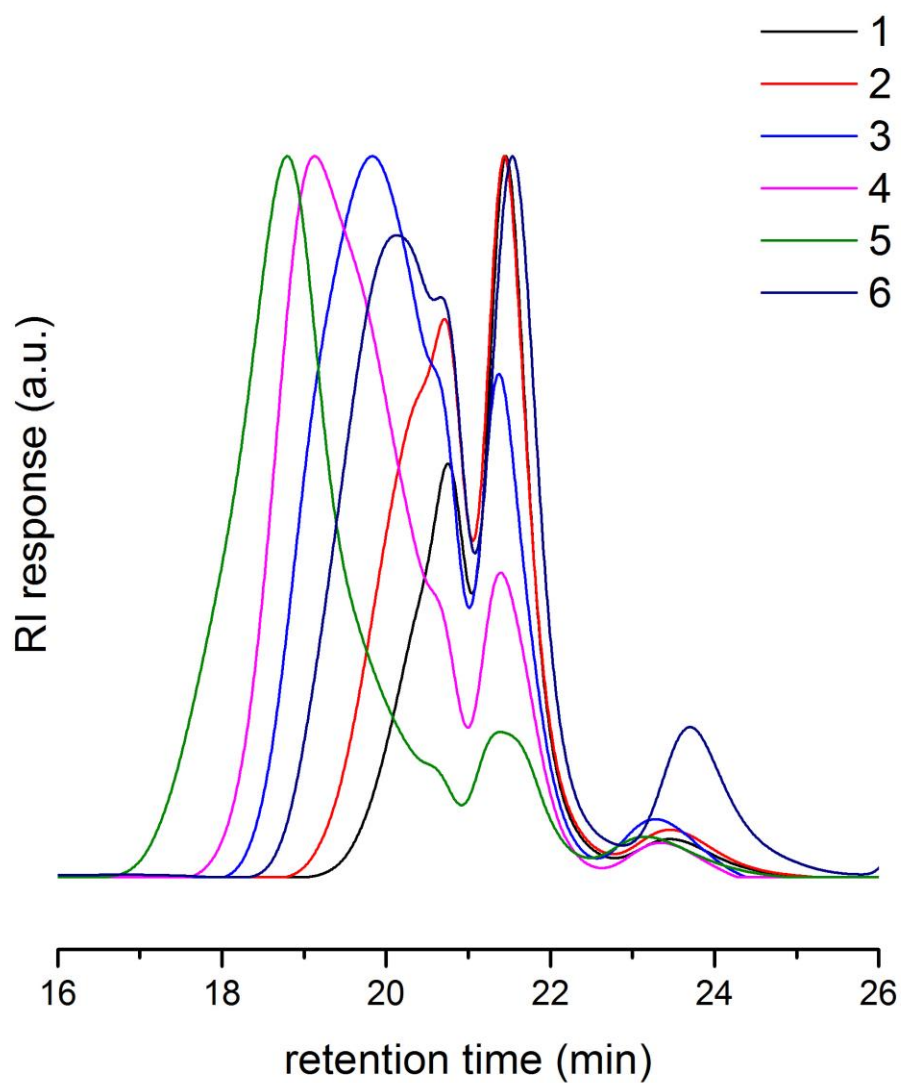

Figure S6. SEC traces of PLA-b-PSs obtained with different [S]:[BMI]:[PLA-CTA] ratios shown in Table S1. The number in the legend indicates the Entry number in Table S1.

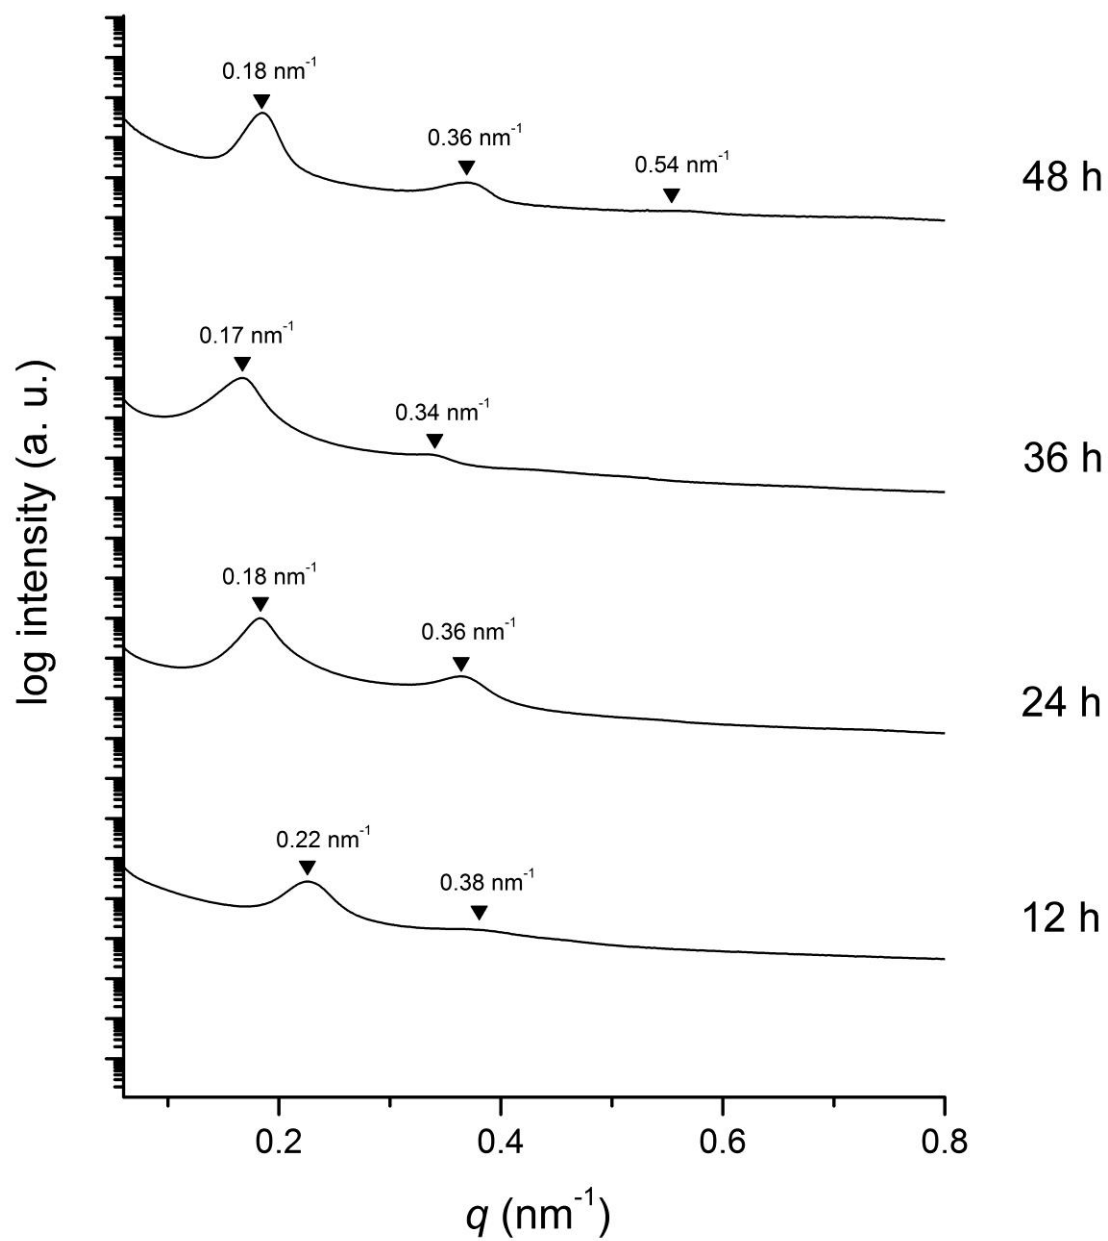

Figure S7. SAXS data of PLA<sub>n</sub>PS<sub>n</sub> shown in Table 1. The data was obtained from as-cast films from toluene solutions at rt.
